# Supplementary material for: Correction: Method for extraction and analysis of per- and poly-fluoroalkyl substances in contaminated asphalt
Source: Royal Society of Chemistry journal article supplement (doi:10.1039/d2ay90109a), 2022-01-01
Supplement: d2ay90109a1.pdf [file d2ay90109a1.pdf]

## Supplementary Information

### Method for extraction and analysis of per- and poly-fluoroalkyl substances in contaminated asphalt

Prashant Srivastava,<sup>\*a</sup> Mike Williams,<sup>a</sup> Jun Du,<sup>a</sup> Divina Navarro,<sup>a</sup> Rai Kookana,<sup>a</sup> Grant

Douglas,<sup>b</sup> Trevor Bastow,<sup>b</sup> Greg Davis,<sup>b</sup> and Jason K. Kirby<sup>a</sup>

<sup>a</sup> Commonwealth Scientific and Industrial Research Organisation (CSIRO), Land and Water, Waite Campus, Urrbrae, South Australia, Australia

<sup>b</sup> Commonwealth Scientific and Industrial Research Organisation (CSIRO), Land and Water, Floreat, Western Australia, Australia

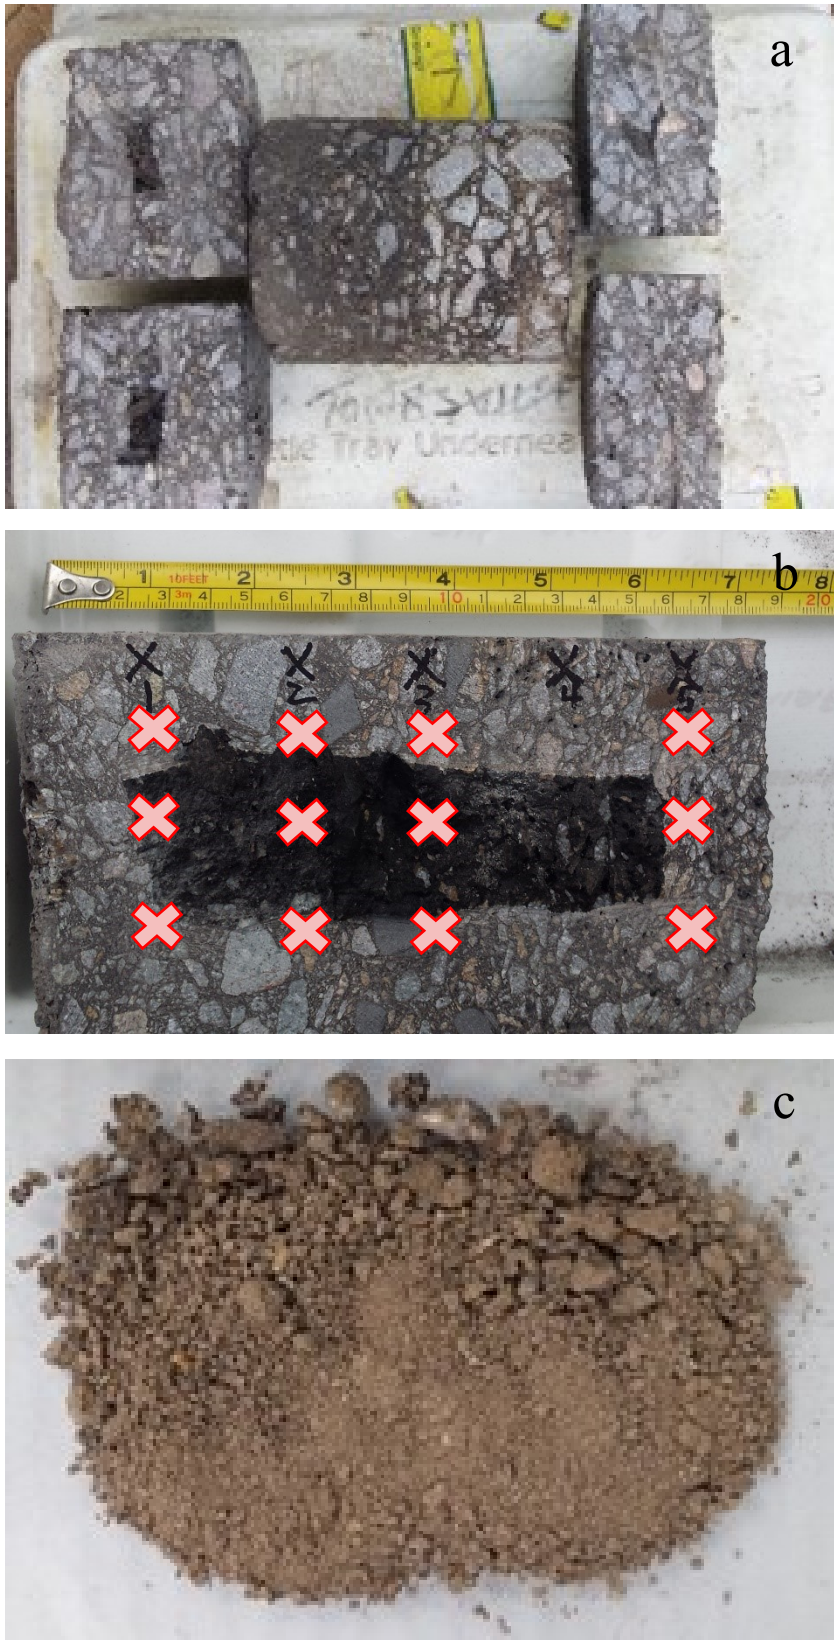

Figure S1. Overview of (a) asphalt core profile, (b) cross-section of asphalt core marked at 50 mm intervals prior to drilling for samples. Red crosses represent an approximate location of triplicate sample for each depth, and (c) asphalt sample collected using a 10 mm drill bit.

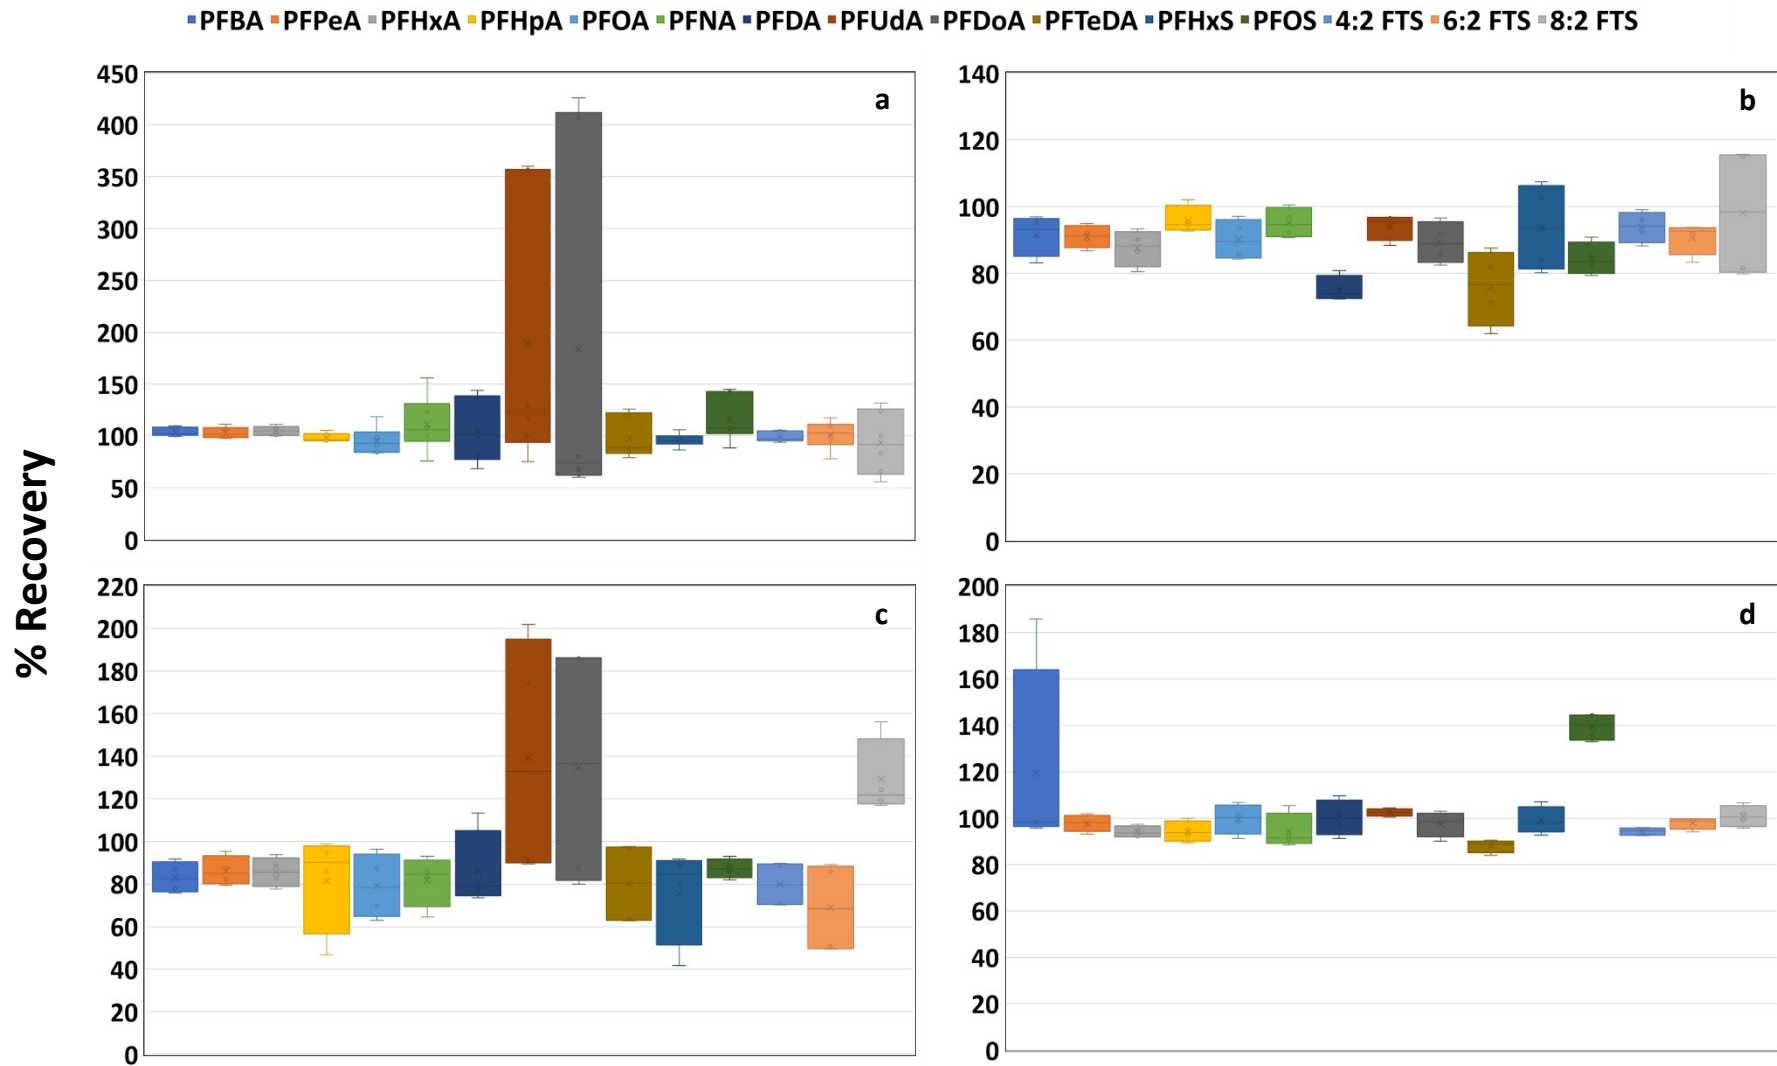

Figure S2. Box plot showing the distribution of recovery of stable isotope-corrected individual PFAS in different cores as a function of (a) stable isotope-labelled internal standard addition timing, (b) sonication temperature, (c) spike level and (d) sample composition (location).

Table S1. Native and stable isotope (SI)-labelled PFAS standards used in this study and their limit of detection (LOD), limit of quantitation (LOQ) and method limit of quantitation (MLOQ) for the chosen method (extractant 2)

| Compound                                       | Acronym  | Stable isotope                       | Linear range (ng L <sup>-1</sup> ) | LOD (ng L <sup>-1</sup> ) | LOQ (ng L <sup>-1</sup> ) | MLOQ (µg kg <sup>-1</sup> ) |
|------------------------------------------------|----------|--------------------------------------|------------------------------------|---------------------------|---------------------------|-----------------------------|
| <b>Perfluoroalkane sulfonic acids (PFASs)</b>  |          |                                      |                                    |                           |                           |                             |
| Perfluorobutane sulfonic acid                  | PFBS     | -                                    | 25-10,000                          | 25                        | 83.25                     | 0.70                        |
| perfluoropentanesulfonic acid                  | PFPeS    | -                                    | 25-10,000                          | 25                        | 83.25                     | 0.90                        |
| Perfluorohexane sulfonic acid                  | PFHxS    | <sup>18</sup> O <sub>2</sub> PFHxS   | 25-10,000                          | 25                        | 83.25                     | 1.00                        |
| Perfluoroheptanesulfonic Acid                  | PFHpS    | -                                    | 25-10,000                          | 25                        | 83.25                     | 1.00                        |
| Perfluorooctane sulfonic acid                  | PFOS     | <sup>13</sup> C <sub>4</sub> PFOS    | 250-10,000                         | 250                       | 832.5                     | 0.70                        |
| perfluorononanesulfonate                       | PFNS     | -                                    | 100-10,000                         | 100                       | 333.0                     | 1.00                        |
| Perfluorodecane sulfonic acid                  | PFDS     | -                                    | 250-10,000                         | 250                       | 832.5                     | 1.00                        |
| <b>Perfluoroalkyl carboxylic acids (PFCAs)</b> |          |                                      |                                    |                           |                           |                             |
| Perfluorobutanoic acid                         | PFBA     | <sup>13</sup> C <sub>4</sub> PFBA    | 25-100                             | 25                        | 83.25                     | 0.15                        |
| Perfluoropentanoic acid                        | PFPeA    | <sup>13</sup> C <sub>3</sub> PFPeA   | 25-100                             | 25                        | 83.25                     | 0.80                        |
| Perfluorohexanoic acid                         | PFHxA    | <sup>13</sup> C <sub>2</sub> PFHxA   | 25-100                             | 25                        | 83.25                     | 0.60                        |
| Perfluoroheptanoic acid                        | PFHpA    | <sup>13</sup> C <sub>4</sub> PFHpA   | 25-100                             | 25                        | 83.25                     | 0.30                        |
| Perfluorooctanoic acid                         | PFOA     | <sup>13</sup> C <sub>4</sub> PFOA    | 25-100                             | 25                        | 83.25                     | 0.60                        |
| Perfluorononanoic acid                         | PFNA     | <sup>13</sup> C <sub>5</sub> PFNA    | 25-100                             | 25                        | 83.25                     | 0.80                        |
| Perfluorodecanoic acid                         | PFDA     | <sup>13</sup> C <sub>2</sub> PFDA    | 50-100                             | 50                        | 166.50                    | 0.90                        |
| Perfluoroundecanoic acid                       | PFUdA    | <sup>13</sup> C <sub>2</sub> PFUdA   | 250-10,000                         | 250                       | 832.50                    | 0.80                        |
| Perfluorododecanoic acid                       | PFDoA    | <sup>13</sup> C <sub>2</sub> PFDoA   | 250-10,000                         | 250                       | 832.50                    | 0.60                        |
| perfluorotridecanoic acid                      | PFTTrDA  | -                                    | 250-10,000                         | 250                       | 832.50                    | 0.70                        |
| Perfluorotetradecanoic acid                    | PFTeDA   | <sup>13</sup> C <sub>2</sub> PFTeDA  | 250-10,000                         | 250                       | 832.50                    | 0.60                        |
| <b>Fluorotelomer sulfonates (FTS)</b>          |          |                                      |                                    |                           |                           |                             |
| 4:2 Fluorotelomer sulfonate                    | 4:2 FTS  | <sup>13</sup> C <sub>2</sub> 4:2 FTS | 25-100                             | 25                        | 83.25                     | 0.50                        |
| 6:2 Fluorotelomer sulfonate                    | 6:2 FTS  | <sup>13</sup> C <sub>2</sub> 6:2 FTS | 25-100                             | 25                        | 83.25                     | 1.00                        |
| 8:2 Fluorotelomer sulfonate                    | 8:2 FTS  | <sup>13</sup> C <sub>2</sub> 8:2 FTS | 50-100                             | 50                        | 166.50                    | 0.40                        |
| 10:2 Fluorotelomer sulfonate                   | 10:2 FTS | -                                    | 250-10,000                         | 250                       | 832.50                    | 1.00                        |

Table S2. Summary of literature for extraction efficiency of PFAS from various solid matrices

| PFAS                                 | Chemical formula                                               | Matrix                                                                                                                               | % recovery                                                                                                                                                                                                                                     |
|--------------------------------------|----------------------------------------------------------------|--------------------------------------------------------------------------------------------------------------------------------------|------------------------------------------------------------------------------------------------------------------------------------------------------------------------------------------------------------------------------------------------|
| Perfluorobutanesulfonate (PFBS)      | C <sub>4</sub> F <sub>9</sub> SO <sub>3</sub>                  | Soil <sup>2-8</sup><br>Sediment <sup>5, 6</sup><br>Wastewater sludge/biosolid <sup>9, 10</sup>                                       | 66-81 (M <sup>a</sup> ), 62-77 (MO <sup>b</sup> ), 71-98 (MN <sup>c</sup> ), 62-84 (MA <sup>d</sup> ), 74-116 (MB <sup>e</sup> ), 61-75 (OS <sup>f</sup> )<br>75-105 (M), 125 (MA), 371 (MN), 144 (MB), 110-112 (OS)<br>144 (MB), 110-112 (OS) |
| Perfluoropentanesulfonate (PFPeS)    | C <sub>5</sub> F <sub>11</sub> SO <sub>3</sub>                 | Soil <sup>8</sup>                                                                                                                    | 96-100 (MN)                                                                                                                                                                                                                                    |
| Perfluorohexanesulfonate (PFHxS)     | C <sub>6</sub> F <sub>13</sub> SO <sub>3</sub>                 | Soil <sup>2-4, 6-8</sup><br>Sediment <sup>5, 6, 11</sup><br>Wastewater sludge/biosolid <sup>9-11</sup><br>Concrete <sup>12</sup>     | 61-99 (M), 62-80 (MO), 79-100 (MN), 63-90 (MA), 73-116 (MB), 67-80 (OS)<br>76-85 (M), 56-85 (MA), 102 (MN), 85 (IP <sup>g</sup> )<br>37-79 (MA), 104 (MB), 110-112 (OS)<br>108 (M)                                                             |
| Perfluoroheptanesulfonate (PFHpS)    | C <sub>7</sub> F <sub>15</sub> SO <sub>3</sub>                 | Soil <sup>6-8</sup><br>Sediment <sup>6</sup><br>Wastewater sludge/biosolid <sup>10</sup>                                             | 82-86 (M), 62-81 (MO), 84-100 (MN), 81-106 (MA), 80-95 (MB), 66-83 (OS)<br>75 (M), 68 (MA), 90 (MN), 69 (IP)<br>118 (MB)                                                                                                                       |
| Perfluorooctanesulfonate (PFOS)      | C <sub>8</sub> F <sub>17</sub> SO <sub>3</sub>                 | Soil <sup>2-4, 6-8, 13</sup><br>Sediment <sup>5, 6, 11</sup><br>Wastewater sludge/biosolid <sup>9-11</sup><br>Concrete <sup>12</sup> | 70-100 (M), 60-81 (MO), 81-100 (MN), 74-92 (MA), 67-104 (MB), 66-81 (OS)<br>71-96 (M), 81-87 (MA), 125 (MN), 179 (IP)<br>79-87 (MA), 95 (MB), 110-112 (OS)<br>102 (M)                                                                          |
| Perfluorononanesulfonate (PFNS)      | C <sub>9</sub> F <sub>19</sub> SO <sub>3</sub>                 | Soil <sup>8</sup><br>Wastewater sludge/biosolid <sup>14</sup>                                                                        | 96-100 (MN)<br>110-112 (OS)                                                                                                                                                                                                                    |
| Perfluorodecanesulfonate (PFDS)      | C <sub>10</sub> F <sub>21</sub> SO <sub>3</sub>                | Soil <sup>2, 3, 6-8</sup><br>Sediment <sup>5, 6, 11</sup><br>Wastewater sludge/biosolid <sup>9-11</sup>                              | 53-105 (M), 95-97 (MN), 81 (MA), 70-106 (MB)<br>75-121 (M), 56-79 (MA), 81 (MN)<br>63-76 (MA), 153 (MB), 93-109 (OS)                                                                                                                           |
| Perfluorododecanesulfonate PFDoS     | C <sub>12</sub> F <sub>25</sub> SO <sub>3</sub>                | Soil <sup>8</sup>                                                                                                                    | 94-98 (MN)                                                                                                                                                                                                                                     |
| Fluorotelomer sulphonates (FTS)      |                                                                |                                                                                                                                      |                                                                                                                                                                                                                                                |
| 4:2 FTS                              | C <sub>6</sub> H <sub>4</sub> F <sub>9</sub> SO <sub>3</sub>   | Soil <sup>7</sup>                                                                                                                    | 80-95 (MB)                                                                                                                                                                                                                                     |
| 6:2 FTS                              | C <sub>8</sub> H <sub>4</sub> F <sub>13</sub> SO <sub>3</sub>  | Soil <sup>3, 7-9, 13</sup><br>Wastewater sludge/biosolid <sup>14</sup>                                                               | 70 (M), 51-58 (MO), 68-100 (MN), 63-120 (MA), 76-110 (MB), 2-64 (OS)<br>116-137 (OS)                                                                                                                                                           |
| 8:2 FTS                              | C <sub>10</sub> H <sub>4</sub> F <sub>17</sub> SO <sub>3</sub> | Soil <sup>3, 7-9</sup><br>Wastewater sludge/biosolid <sup>14</sup>                                                                   | 71 (M), 59-60 (MO), 70-100 (MN), 65-100 (MA), 73-121 (MB), 0-96 (OS)<br>116-127 (OS)                                                                                                                                                           |
| 10:2 FTS                             | C <sub>12</sub> H <sub>4</sub> F <sub>21</sub> SO <sub>3</sub> | Soil <sup>8</sup>                                                                                                                    | 103-108 (MN)                                                                                                                                                                                                                                   |
| Perfluorooctane sulphonamides (FOSA) |                                                                |                                                                                                                                      |                                                                                                                                                                                                                                                |
| FOSA                                 | C <sub>8</sub> H <sub>2</sub> F <sub>9</sub> SO <sub>2</sub> N | Soil <sup>3, 7, 8</sup>                                                                                                              | 97-100 (MN), 95-110 (MB)                                                                                                                                                                                                                       |

|                                                  |                                                                                |                     |                                                                  |
|--------------------------------------------------|--------------------------------------------------------------------------------|---------------------|------------------------------------------------------------------|
| MeFOSA                                           | C <sub>9</sub> H <sub>4</sub> F <sub>9</sub> SO <sub>2</sub> N                 | Soil <sup>8</sup>   | 92-98 (MN)                                                       |
| EtFOSA                                           | C <sub>10</sub> H <sub>6</sub> F <sub>9</sub> SO <sub>2</sub> N                | Soil <sup>7,8</sup> | 97-101 (MN), 80-95 (MB)                                          |
| Perfluoroalkyl sulphonamido acetic acids (FOSAA) |                                                                                |                     |                                                                  |
| FOSAA                                            | C <sub>10</sub> H <sub>3</sub> F <sub>9</sub> SO <sub>4</sub> N                | Soil <sup>7,8</sup> | 91-109 (MN), 60-115 (MB)                                         |
| MeFOSAA                                          | C <sub>11</sub> H <sub>5</sub> F <sub>9</sub> SO <sub>4</sub> N                | Soil <sup>8</sup>   | 92-103 (MN)                                                      |
| EtFOSAA                                          | C <sub>12</sub> H <sub>7</sub> F <sub>9</sub> SO <sub>4</sub> N                | Soil <sup>8</sup>   | 99-114 (MN)                                                      |
| Perfluoroalkane/fluorotelomer betaines           |                                                                                |                     |                                                                  |
| PFOSB                                            | C <sub>15</sub> H <sub>15</sub> F <sub>17</sub> SO <sub>4</sub> N <sub>2</sub> | Soil <sup>7</sup>   | 40 (MB)                                                          |
| 6:2 FTAB                                         | C <sub>15</sub> H <sub>19</sub> F <sub>17</sub> SO <sub>4</sub> N <sub>2</sub> | Soil <sup>7,8</sup> | 20 (M), 3 (MO), 46-97 (MN), 19-100 (MA), 17-90 (MB), 0-21 (OS)   |
| 12:2 FTAB                                        | C <sub>21</sub> H <sub>19</sub> F <sub>25</sub> SO <sub>4</sub> N <sub>2</sub> | Soil <sup>8</sup>   | 94-100 (MN)                                                      |
| 5:3 FTB                                          | C <sub>10</sub> H <sub>14</sub> F <sub>11</sub> O <sub>2</sub> N               | Soil <sup>8</sup>   | 21 (M), 4 (MO), 48-97 (MN), 21-100 (MA), 32-82 (MB), 0-22 (OS)   |
| 7:3 FTB                                          | C <sub>12</sub> H <sub>14</sub> F <sub>15</sub> O <sub>2</sub> N               | Soil <sup>8</sup>   | 23 (M), 4-5 (MO), 50-94 (MN), 23-100 (MA), 34-92 (MB), 0-23 (OS) |
| 9:3 FTB                                          | C <sub>14</sub> H <sub>14</sub> F <sub>19</sub> O <sub>2</sub> N               | Soil <sup>8</sup>   | 26 (M), 5-6 (MO), 53-87 (MN), 26-100 (MA), 40-79 (MB), 1-26 (OS) |
| 11:3 FTB                                         | C <sub>16</sub> H <sub>14</sub> F <sub>23</sub> O <sub>2</sub> N               | Soil <sup>8</sup>   | 25 (M), 5-6 (MO), 50-94 (MN), 25-100 (MA), 35-75 (MB), 0-23 (OS) |
| 5:1:2 FTB                                        | C <sub>10</sub> H <sub>14</sub> F <sub>12</sub> O <sub>2</sub> N               | Soil <sup>8</sup>   | 23 (M), 4 (MO), 51-75 (MN), 23-100 (MA), 35-97 (MB), 0-2 (OS)    |
| 7:1:2 FTB                                        | C <sub>12</sub> H <sub>14</sub> F <sub>16</sub> O <sub>2</sub> N               | Soil <sup>8</sup>   | 24 (M), 5 (MO), 52-76 (MN), 24-100 (MA), 32-98 (MB), 0-2 (OS)    |
| 9:1:2 FTB                                        | C <sub>14</sub> H <sub>14</sub> F <sub>20</sub> O <sub>2</sub> N               | Soil <sup>8</sup>   | 28 (M), 6 (MO), 55-81 (MN), 28-100 (MA), 42-63 (MB), 0-2 (OS)    |
| 11:1:2 FTB                                       | C <sub>16</sub> H <sub>14</sub> F <sub>20</sub> O <sub>2</sub> N               | Soil <sup>8</sup>   | 28 (M), 6 (MO), 52-76 (MN), 28-100 (MA), 37-102 (MB), 0-2 (OS)   |
| 6:2 FTSAB                                        | C <sub>12</sub> H <sub>14</sub> F <sub>16</sub> O <sub>2</sub> N               | Soil <sup>8,9</sup> | 90-99 (MN), 37 (MA)                                              |
| Fluorotelomer unsaturated acids                  |                                                                                |                     |                                                                  |
| 6:2 FTUA                                         | C <sub>8</sub> HF <sub>12</sub> O <sub>2</sub>                                 | Soil <sup>7,8</sup> | 94-101 (MN), 70 (MB)                                             |
| 8:2 FTUA                                         | C <sub>10</sub> HF <sub>16</sub> O <sub>2</sub>                                | Soil <sup>7,8</sup> | 96-104 (MN), 70 (MB)                                             |

| Fluorotelomer carboxylic acids |                      |                     |                        |
|--------------------------------|----------------------|---------------------|------------------------|
| 4:3 FTCA                       | $C_7H_4F_9O_2$       | Soil <sup>8</sup>   | 89-96 (MN)             |
| 5:3 FTCA                       | $C_8H_4F_{11}O_2$    | Soil <sup>7,8</sup> | 89-95 (MN), 40-60 (MB) |
| 7:3 FTCA                       | $C_{10}H_4F_{15}O_2$ | Soil <sup>7,8</sup> | 92-94 (MN), 60-70(MB)  |

<sup>a</sup>M=methanol, <sup>b</sup>MO=methanol + other solvent, <sup>c</sup>MN=pH neutral methanol, <sup>d</sup>MA=acidic methanol, <sup>e</sup>MB=basic methanol, <sup>f</sup>OS=other solvent, <sup>g</sup>IP=ion pairing

Table S3. Mass spectrometry multiple reaction monitoring (MRM) parameters for PFAS

| Compound                            | Polarity | Precursor (m/z) | Product (m/z) | Collision Energy (V) | Min Dwell Time (ms) | RF Lens (V) |
|-------------------------------------|----------|-----------------|---------------|----------------------|---------------------|-------------|
| PFBA                                | Negative | 212.979         | 168.97        | 9                    | 25.912              | 30          |
| <sup>13</sup> C <sub>4</sub> PFBA   | Negative | 216.993         | 172           | 9                    | 25.912              | 30          |
| PFPeA                               | Negative | 262.976         | 219.042       | 9                    | 3.384               | 31          |
| <sup>13</sup> C <sub>3</sub> PFPeA  | Negative | 266             | 222           | 9                    | 3.384               | 32          |
| PFHxA                               | Negative | 312.973         | 119.042       | 18.76                | 3.384               | 39          |
| PFHxA                               | Negative | 312.973         | 268.97        | 9                    | 3.384               | 39          |
| <sup>13</sup> C <sub>2</sub> PFHxA  | Negative | 315             | 270           | 9                    | 3.384               | 37          |
| PFHpA                               | Negative | 362.97          | 168.97        | 15.53                | 3.384               | 43          |
| PFHpA                               | Negative | 362.97          | 319.042       | 9                    | 3.384               | 43          |
| <sup>13</sup> C <sub>4</sub> PFHpA  | Negative | 366.983         | 321.98        | 9                    | 3.384               | 43          |
| PFOA                                | Negative | 412.966         | 169           | 16.1                 | 3.384               | 49          |
| PFOA                                | Negative | 412.966         | 369.042       | 9                    | 3.384               | 49          |
| <sup>13</sup> C <sub>4</sub> PFOA   | Negative | 417             | 372           | 9                    | 3.384               | 49          |
| PFNA                                | Negative | 462.963         | 219.012       | 15.23                | 3.384               | 52          |
| PFNA                                | Negative | 462.963         | 418.97        | 9                    | 3.384               | 52          |
| <sup>13</sup> C <sub>5</sub> PFNA   | Negative | 468             | 423           | 9                    | 3.384               | 52          |
| PFDA                                | Negative | 512.96          | 269.042       | 15.8                 | 3.384               | 56          |
| PFDA                                | Negative | 512.96          | 469.042       | 9                    | 3.384               | 56          |
| <sup>13</sup> C <sub>2</sub> PFDA   | Negative | 515             | 470           | 9                    | 3.384               | 56          |
| PFUdA                               | Negative | 562.957         | 269.03        | 16.94                | 3.384               | 62          |
| PFUdA                               | Negative | 562.957         | 518.97        | 9                    | 3.384               | 62          |
| <sup>13</sup> C <sub>2</sub> PFUdA  | Negative | 564.964         | 519.97        | 9                    | 3.384               | 62          |
| PFDoA                               | Negative | 612.954         | 319.042       | 17.54                | 3.384               | 67          |
| PFDoA                               | Negative | 612.954         | 569           | 9                    | 3.384               | 67          |
| <sup>13</sup> C <sub>2</sub> PFDoA  | Negative | 614.96          | 569.97        | 9                    | 3.384               | 67          |
| PFTTrDA                             | Negative | 662.95          | 169           | 20                   | 3.384               | 71          |
| PFTTrDA                             | Negative | 662.95          | 618.83        | 13                   | 3.384               | 71          |
| PFTeDA                              | Negative | 713             | 369           | 18.87                | 3.384               | 74          |
| PFTeDA                              | Negative | 713             | 669           | 9                    | 3.384               | 74          |
| <sup>13</sup> C <sub>2</sub> PFTeDA | Negative | 714.954         | 669.96        | 9                    | 3.384               | 74          |
| PFBS                                | Negative | 298.943         | 79.957        | 34                   | 3.384               | 116         |
| PFBS                                | Negative | 298.943         | 98.956        | 29                   | 3.384               | 116         |
| <sup>13</sup> C <sub>3</sub> PFBS   | Negative | 301.8           | 80.5          | 34                   | 3.384               | 70          |
| PFPeS                               | Negative | 348.94          | 80.042        | 33.66                | 3.384               | 145         |
| PFPeS                               | Negative | 348.94          | 99            | 31                   | 3.384               | 145         |
| PFHxS                               | Negative | 398.937         | 79.957        | 39                   | 3.384               | 135         |
| PFHxS                               | Negative | 398.937         | 98.956        | 35                   | 3.384               | 135         |
| <sup>18</sup> O <sub>2</sub> PFHxS  | Negative | 403             | 103           | 35                   | 3.384               | 135         |
| PFHpS                               | Negative | 448.933         | 80.012        | 37.6                 | 3.384               | 131         |
| PFHpS                               | Negative | 448.933         | 98.97         | 36.2                 | 3.384               | 131         |



|                                      |          |         |         |       |       |     |
|--------------------------------------|----------|---------|---------|-------|-------|-----|
| PFOS                                 | Negative | 498.93  | 79.957  | 47    | 3.384 | 159 |
| PFOS                                 | Negative | 498.93  | 98.956  | 40    | 3.384 | 159 |
| <sup>13</sup> C <sub>4</sub> PFOS    | Negative | 503     | 99      | 40    | 3.384 | 159 |
| <sup>13</sup> C <sub>8</sub> PFOS    | Negative | 506.8   | 79.9    | 47    | 3.384 | 70  |
| PFNS                                 | Negative | 548.927 | 80.071  | 42.34 | 3.384 | 148 |
| PFNS                                 | Negative | 548.927 | 98.97   | 40.67 | 3.384 | 148 |
| PFDS                                 | Negative | 598.924 | 80.042  | 44.92 | 3.384 | 169 |
| PFDS                                 | Negative | 598.924 | 98.929  | 43.48 | 3.384 | 169 |
| 4:2 FTS                              | Negative | 326.974 | 81.042  | 26.07 | 3.384 | 115 |
| 4:2 FTS                              | Negative | 326.974 | 307.042 | 18.11 | 3.384 | 115 |
| <sup>13</sup> C <sub>2</sub> 4:2 FTS | Negative | 328.981 | 308.96  | 18    | 3.384 | 115 |
| 6:2 FTS                              | Negative | 426.968 | 81.042  | 29.94 | 3.384 | 123 |
| 6:2 FTS                              | Negative | 426.968 | 406.988 | 21.45 | 3.384 | 123 |
| <sup>13</sup> C <sub>2</sub> 6:2 FTS | Negative | 428.975 | 408.96  | 21    | 3.384 | 123 |
| 8:2 FTS                              | Negative | 526.962 | 81.012  | 34.83 | 3.384 | 137 |
| 8:2 FTS                              | Negative | 526.962 | 506.97  | 24.37 | 3.384 | 137 |
| <sup>13</sup> C <sub>2</sub> 8:2 FTS | Negative | 528.968 | 508.96  | 24    | 3.384 | 137 |
| 10:2 FTS                             | Negative | 627.033 | 81.073  | 32    | 3.384 | 147 |
| 10:2 FTS                             | Negative | 627.033 | 606.975 | 32    | 3.384 | 147 |

---

Table S4. Mean recovery (%) of PFAS (without stable isotope-correction) from spiked asphalt using six extractants.

| PFAS species        |             | Extractant 1 |       | Extractant 2 |       | Extractant 3 |       | Extractant 4 |       | Extractant 5 |       | Extractant 6 |       |
|---------------------|-------------|--------------|-------|--------------|-------|--------------|-------|--------------|-------|--------------|-------|--------------|-------|
|                     |             | Mean         | % RSD |
| Short-chain<br>PFCA | PFBA        | 121.1        | 2.6   | 116.4        | 5.1   | 119.0        | 5.6   | 52.0*        | 21.7  | 135.0        | 6.0   | 128.7        | 2.7   |
|                     | PFPeA       | 117.8        | 7.0   | 112.1        | 4.1   | 109.0        | 4.1   | 37.7*        | 22.3  | 114.7        | 8.8   | 119.1        | 3.4   |
|                     | PFHxA       | 118.1        | 4.9   | 115.0        | 3.9   | 112.0        | 4.2   | 37.4*        | 18.1  | 121.7        | 12.3  | 120.7        | 2.3   |
|                     | PFHpA       | 112.4        | 4.5   | 114.3        | 3.3   | 113.3        | 1.7   | 45.5*        | 20.3  | 116.6        | 5.1   | 123.8        | 5.1   |
|                     | MEAN        | 117.4        | 4.8   | 114.5        | 4.1   | 113.3        | 3.9   | 43.2         | 20.6  | 122.0        | 8.0   | 123.1        | 3.4   |
| Long-chain<br>PFCA  | PFOA        | 111.0        | 2.5   | 111.1        | 6.8   | 109.1        | 2.3   | 45.6*        | 28.6  | 124.2        | 16.3  | 136.1        | 4.8   |
|                     | PFNA        | 137.4        | 16.6  | 133.3        | 2.0   | 142.1        | 6.3   | 57.6*        | 32.2  | 132.0        | 10.6  | 108.5        | 23.3  |
|                     | PFDA        | 162.6        | 13.6  | 144.9        | 32.3  | 124.0        | 6.5   | 40.3*        | 37.7  | 152.8        | 51.3  | 144.7        | 21.8  |
|                     | PFUdA       | 92.2         | 22.4  | 91.9         | 19.0  | 131.1        | 4.8   | 0.0          | 0.0   | 128.0        | 7.7   | 202.3        | 14.7  |
|                     | PFDoA       | 90.0         | 11.7  | 99.6         | 13.2  | 109.8        | 9.4   | 0.0          | 0.0   | 97.7         | 16.8  | 145.5        | 21.3  |
|                     | PFTTrDA     | 107.4        | 3.4   | 121.8        | 8.9   | 114.3        | 2.0   | 0.0          | 0.0   | 119.2        | 2.3   | 211.1        | 8.8   |
|                     | PFTeDA      | 169.1        | 22.8  | 149.2        | 10.8  | 173.2        | 3.8   | 0.0          | 0.0   | 178.2        | 11.1  | 277.2        | 1.5   |
| MEAN                | 124.2       | 13.3         | 121.7 | 13.3         | 129.1 | 5.0          | 20.5  | 32.8         | 133.2 | 16.6         | 175.1 | 13.7         |       |
| PFCA                | MEAN        | 121.6        | 10.0  | 118.9        | 9.8   | 123.0        | 4.6   | 29.2         | 26.0  | 128.9        | 13.3  | 155.1        | 9.7   |
| Short-chain<br>PFSA | PFBS        | 107.9        | 2.9   | 105.5        | 6.1   | 103.5        | 5.9   | 119.7        | 8.9   | 115.5        | 4.1   | 116.2        | 6.4   |
|                     | PFPeS       | 109.1        | 6.8   | 108.5        | 6.0   | 106.2        | 5.8   | 120.3        | 4.6   | 113.0        | 3.7   | 118.9        | 9.0   |
|                     | MEAN        | 108.5        | 4.9   | 107.0        | 6.1   | 104.8        | 5.8   | 120.0        | 6.7   | 114.2        | 3.9   | 117.6        | 7.7   |
| Long-chain<br>PFSA  | PFHxS       | 118.8        | 10.3  | 114.9        | 3.4   | 111.1        | 7.6   | 130.2        | 2.1   | 127.3        | 3.6   | 133.2        | 3.4   |
|                     | PFHpS       | 119.2        | 4.1   | 111.3        | 8.0   | 111.1        | 6.5   | 123.0        | 5.6   | 120.8        | 3.2   | 116.9        | 4.1   |
|                     | PFOS linear | 155.4        | 15.7  | 150.3        | 9.4   | 136.3        | 15.2  | 162.7        | 12.5  | 164.2        | 23.6  | 152.8        | 12.7  |
|                     | PFNS        | 189.8        | 20.9  | 174.1        | 33.3  | 117.5        | 10.8  | 143.8        | 22.3  | 157.0        | 40.6  | 152.2        | 21.4  |
|                     | PFDS        | 70.4         | 2.7   | 85.1         | 12.0  | 89.0         | 1.7   | 107.2        | 11.8  | 96.1         | 17.9  | 123.5        | 18.9  |
| MEAN                | 130.7       | 12.7         | 127.1 | 15.0         | 113.0 | 9.0          | 133.4 | 11.2         | 133.1 | 19.3         | 135.8 | 12.5         |       |
| PFSA                | MEAN        | 119.6        | 9.2   | 117.1        | 10.9  | 108.9        | 7.5   | 126.7        | 9.1   | 123.6        | 12.2  | 126.7        | 10.3  |
| FTS                 | 4:2 FTS     | 115.6        | 2.5   | 105.9        | 7.1   | 116.6        | 5.2   | 135.4        | 4.8   | 123.1        | 13.7  | 136.3        | 1.0   |
|                     | 6:2 FTS     | 119.9        | 9.7   | 113.5        | 12.8  | 116.6        | 8.0   | 132.5        | 15.8  | 135.4        | 9.2   | 152.3        | 0.2   |
|                     | 8:2 FTS     | 121.9        | 11.6  | 120.4        | 15.8  | 85.4         | 6.8   | 50.2*        | 14.4  | 121.8        | 48.3  | 150.8        | 45.7  |

|          |       |     |       |      |       |     |       |      |       |      |       |      |
|----------|-------|-----|-------|------|-------|-----|-------|------|-------|------|-------|------|
| 10:2 FTS | 112.0 | 3.1 | 154.1 | 7.1  | 161.2 | 8.6 | 171.0 | 23.8 | 150.1 | 15.4 | 209.2 | 27.9 |
| MEAN     | 117.4 | 6.8 | 123.5 | 10.5 | 120.0 | 7.3 | 122.3 | 15.4 | 132.6 | 21.0 | 162.1 | 19.9 |

\* denotes statistically significant difference in comparison to other extractants.

## References

1. HEPA, PFAS National Environmental Management Plan Version 2.0, <http://www.environment.gov.au/system/files/resources/2fadf1bc-b0b6-44cb-a192-78c522d5ec3f/files/pfas-nemp-2.pdf>.
2. S. Q. Chen, Y. Q. Zhou, J. Meng and T. Y. Wang, *Environ Pollut*, 2018, **242**, 2059-2067.
3. E. F. Houtz, C. P. Higgins, J. A. Field and D. L. Sedlak, *Environ Sci Technol*, 2013, **47**, 8187-8195.
4. C. A. Huset and K. M. Barry, *Methodsx*, 2018, **5**, 697-704.
5. Y. M. Lee, J. Y. Lee, M. K. Kim, H. Yang, J. E. Lee, Y. Son, Y. Kho, K. Choi and K. D. Zoh, *J Hazard Mater*, 2020, **381**.
6. M. Lorenzo, J. Campo and Y. Pico, *Anal Bioanal Chem*, 2015, **407**, 5767-5781.
7. S. Mejia-Avendano, G. Munoz, S. Sauve and J. X. Liu, *Anal Chem*, 2017, **89**, 2539-2546.
8. G. Munoz, P. Ray, S. Mejia-Avendano, S. V. Duy, D. T. Do, J. X. Liu and S. Sauve, *Anal Chim Acta*, 2018, **1034**, 74-84.
9. K. A. Barzen-Hanson, S. E. Davis, M. Kleber and J. A. Field, *Environ Sci Technol*, 2017, **51**, 12394-12404.
10. J. G. Sepulvado, A. C. Blaine, L. S. Hundal and C. P. Higgins, *Environ Sci Technol*, 2011, **45**, 8106-8112.
11. C. P. Higgins, J. A. Field, C. S. Criddle and R. G. Luthy, *Environ Sci Technol*, 2005, **39**, 3946-3956.
12. C. Baduel, C. J. Paxman and J. F. Mueller, *J Hazard Mater*, 2015, **296**, 46-53.
13. H. N. Zhang, B. Wen, W. Wen, Y. B. Ma, X. Y. Hu, Y. L. Wu, L. Luo and S. Z. Zhang, *J Chromatogr B*, 2018, **1072**, 25-33.
14. T. Ruan, Y. F. Lin, T. Wang, R. Z. Liu and G. B. Jiang, *Environ Sci Technol*, 2015, **49**, 6519-6527.
